# Supplementary material
Source: PubMed Central journal article supplement (PMC10664203)
Supplement: NIHMS1943209-supplement-co1c00140_si.pdf [file NIHMS1943209-supplement-co1c00140_si.pdf]

## **Supporting Information**

### **Profiling SARS-CoV-2 Main Protease (M<sup>PRO</sup>) Binding to Repurposed Drugs Using Molecular Dynamics Simulations in Classical and Neural Network-Trained Force Fields**

Aayush Gupta<sup>1</sup> and Huan-Xiang Zhou<sup>1, 2, \*</sup>

<sup>1</sup>Department of Chemistry and <sup>2</sup>Department of Physics, University of Illinois at Chicago,  
Chicago, IL 60607, USA

\*Corresponding Author: Huan-Xiang Zhou (Email: [hzhou43@uic.edu](mailto:hzhou43@uic.edu))

**Table S1;** Random set of 62 compounds that were filtered due to docking scores ( $> -8.5$  kcal/mol). Entries are ordered according to docking score; any available experimental information on efficacy is also listed.

| ZINCID           | name                      | docking score (kcal/mol) | experimental information                           |
|------------------|---------------------------|--------------------------|----------------------------------------------------|
| ZINC000001530427 | Fosfomycin                | -3.8                     |                                                    |
| ZINC000004658290 | Mercaptopurine            | -4.4                     |                                                    |
| ZINC000100009383 | D-glucose                 | -4.4                     |                                                    |
| ZINC000003831551 | Tiopronin                 | -4.5                     |                                                    |
| ZINC000245204924 | Lindane                   | -4.5                     |                                                    |
| ZINC000014881137 | Didecyl-Dimethyl-Ammonium | -4.8                     |                                                    |
| ZINC000000008492 | 8-Hydroxyquinoline        | -4.9                     |                                                    |
| ZINC000000896546 | Flucytosine               | -4.9                     |                                                    |
| ZINC000001690604 | Norpholedrine             | -5.0                     |                                                    |
| ZINC000008466459 | Levmetamfetamine          | -5.0                     |                                                    |
| ZINC000000896666 | Tranlycypromine           | -5.0                     |                                                    |
| ZINC000000967520 | Camphor                   | -5.2                     |                                                    |
| ZINC000001530737 | Nizatidine                | -5.2                     |                                                    |
| ZINC000001633887 | Octinoxate                | -5.5                     |                                                    |
| ZINC000003830635 | Deferoxamine              | -5.5                     |                                                    |
| ZINC000003830960 | Lopromide                 | -5.5                     |                                                    |
| ZINC000085205448 | Nifedipine                | -5.6                     |                                                    |
| ZINC000001633889 | Octinoxate                | -5.7                     |                                                    |
| ZINC000000001673 | Melphalan                 | -5.8                     |                                                    |
| ZINC000000006016 | Venlafaxine               | -5.8                     |                                                    |
| ZINC000256433952 | Norelgestromin            | -6.0                     |                                                    |
| ZINC000000005895 | Rizatriptan               | -6.1                     |                                                    |
| ZINC000002548959 | Methoxsalen               | -6.2                     |                                                    |
| ZINC000003956788 | Nitazoxanide              | -6.2                     |                                                    |
| ZINC000001554010 | Gabapentin                | -6.3                     |                                                    |
| ZINC000000018635 | Frovatriptan              | -6.4                     |                                                    |
| ZINC000000607939 | Isradipin                 | -6.4                     |                                                    |
| ZINC000003991624 | Vilanterol                | -6.4                     |                                                    |
| ZINC000003831405 | Quinidine                 | -6.6                     | antiviral activity but target unknown <sup>a</sup> |
| ZINC000000005823 | Torseamide                | -6.6                     |                                                    |
| ZINC000003807804 | Clotrimazole              | -6.7                     |                                                    |
| ZINC000000120286 | Triamteril                | -6.7                     |                                                    |
| ZINC000003831404 | Quinine                   | -6.7                     |                                                    |
| ZINC000000005560 | Ketoprofen                | -6.7                     |                                                    |
| ZINC000002570817 | Bromfenac                 | -6.7                     |                                                    |

|                  |                              |      |                       |
|------------------|------------------------------|------|-----------------------|
| ZINC000053084692 | Safinamide                   | -6.7 |                       |
| ZINC000026011099 | Omacetaxine<br>Mepesuccinate | -6.8 |                       |
| ZINC000256433955 | Norelgestromin               | -6.9 |                       |
| ZINC000004216238 | Fludarabine                  | -6.9 |                       |
| ZINC000169677008 | Everolimus                   | -6.9 |                       |
| ZINC000002599970 | Formoterol                   | -7.0 |                       |
| ZINC000100014475 | Nitisinone                   | -7.0 |                       |
| ZINC000051133897 | Piroxicam                    | -7.1 |                       |
| ZINC000014961096 | Alogliptin                   | -7.2 |                       |
| ZINC000003861806 | Podophyllotoxin              | -7.3 |                       |
| ZINC000000389747 | Naloxone                     | -7.3 |                       |
| ZINC000000602128 | Bepotastine                  | -7.3 |                       |
| ZINC000009574770 | Telithromycin                | -7.3 |                       |
| ZINC000095616601 | Prazosin                     | -7.5 |                       |
| ZINC000002568036 | Dantrolene                   | -7.5 |                       |
| ZINC000003607120 | Gatifloxacin                 | -7.6 |                       |
| ZINC000004212809 | Deflazacort                  | -7.6 |                       |
| ZINC000000002299 | Asenapine                    | -7.7 |                       |
| ZINC000001529323 | Methotrexate                 | -7.8 |                       |
| ZINC000000608382 | Flavoxate                    | -7.8 |                       |
| ZINC000000025958 | Rucaparib                    | -7.8 |                       |
| ZINC000002005305 | Levomefolic acid             | -8.0 |                       |
| ZINC000150588351 | Elbasvir                     | -8.0 | Negative <sup>b</sup> |
| ZINC000003918087 | Doxorubicin                  | -8.2 |                       |
| ZINC000000607986 | Nebivolol                    | -8.2 |                       |
| ZINC000034089131 | Ulipristal                   | -8.3 |                       |
| ZINC000003816287 | Axitinib                     | -8.4 |                       |

<sup>a</sup>Touret, Franck, Magali Gilles, Karine Barral, Antoine Nougairède, Jacques van Helden, Etienne Decroly, Xavier de Lamballerie, and Bruno Coutard. "In vitro screening of a FDA approved chemical library reveals potential inhibitors of SARS-CoV-2 replication." *Scientific reports* 10, no. 1 (2020): 1-8.

<sup>b</sup>Drayman, N., Jones, K.A., Azizi, S.A., Froggatt, H.M., Tan, K., Maltseva, N.I., Chen, S., Nicolaescu, V., Dvorkin, S., Furlong, K. and Kathayat, R.S., 2020. Drug repurposing screen identifies masitinib as a 3CLpro inhibitor that blocks replication of SARS-CoV-2 in vitro. *bioRxiv*.

**Table S2.** List of 26 FDA-approved drugs, showing ZINC IDs, marketed names, docking scores, lig-RMSDs in ANI/MM MD simulations, and 2D structures. Entries are ordered according to ascending lig-RMSDs.

| ZINC-ID          | name        | docking score (kcal/mol) | lig-RMSD (Å; ANI/MM) | 2D structure                                                                          |
|------------------|-------------|--------------------------|----------------------|---------------------------------------------------------------------------------------|
| ZINC000003938684 | Etoposide   | -9.4                     | 2.13                 | 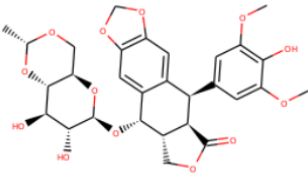   |
| ZINC000100013130 | Midostaurin | -8.9                     | 2.17                 |    |
| ZINC000003860453 | Fluorescein | -9.3                     | 2.59                 |   |
| ZINC000028232750 | Valrubicin  | -8.7                     | 2.76                 |  |
| ZINC000000538550 | Ziprasidone | -8.5                     | 3.27                 |  |
| ZINC000222731806 | Enasidenib  | -9.0                     | 3.64                 |  |

|                  |                   |      |      |                                                                                       |
|------------------|-------------------|------|------|---------------------------------------------------------------------------------------|
| ZINC000011677837 | Apixaban          | -8.5 | 3.82 | 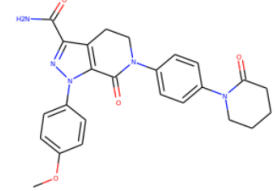   |
| ZINC000003978005 | Dihydroergotamine | -9.5 | 3.85 |    |
| ZINC000169289767 | Trypan Blue       | -8.7 | 3.87 |    |
| ZINC000003993855 | Tadalafil         | -9.2 | 4.47 |    |
| ZINC000003938686 | Palbociclib       | -8.7 | 4.58 |   |
| ZINC000003816514 | Rolapitant        | -9.3 | 4.95 |  |
| ZINC000014210642 | Azilsartan        | -8.6 | 5.89 |  |
| ZINC000004074875 | Candesartan       | -8.6 | 5.96 |  |
| ZINC000036701290 | Ponatinib         | -8.5 | 6.18 |  |

|                  |                |      |      |                                                                                       |
|------------------|----------------|------|------|---------------------------------------------------------------------------------------|
| ZINC000150338755 | Venetoclax     | -9.5 | 6.20 | 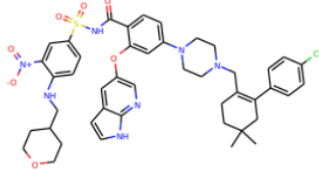   |
| ZINC000000897089 | Mefloquine     | -8.5 | 6.36 |    |
| ZINC000003985982 | Eplerenone     | -8.8 | 7.26 |    |
| ZINC000000897240 | Azelastine     | -9.0 | 7.90 |   |
| ZINC000253387843 | Amphotericin B | -8.7 | 8.85 |  |
| ZINC000013986658 | Idelalisib     | -8.5 | 8.91 |  |
| ZINC000100003902 | Maraviroc      | -8.7 | 9.03 |  |
| ZINC000001530886 | Telmisartan    | -8.8 | 9.98 |  |

|                  |              |      |       |                                                                                     |
|------------------|--------------|------|-------|-------------------------------------------------------------------------------------|
| ZINC000169621220 | Natamycin I  | -9.5 | 10.85 | 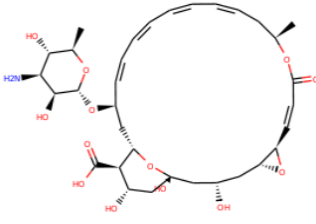 |
| ZINC000004097343 | Itraconazole | -8.7 | 11.09 |  |
| ZINC000008220909 | Natamycin II | -8.8 | 16.15 |  |

**Table S3.** MM/PBSA binding free energies for 26 drug molecules, from ANI/MM MD simulations.<sup>a</sup>

| Drug              | Coul   | LJ     | PB     | SA    | gas    | sol   | pol   | npol   | total  |
|-------------------|--------|--------|--------|-------|--------|-------|-------|--------|--------|
| Etoposide         | -24.56 | -47.42 | 67.27  | -5.24 | -71.98 | 62.03 | 42.70 | -52.66 | -9.96  |
| Midostaurin       | -16.86 | -43.40 | 49.11  | -5.05 | -60.26 | 44.06 | 32.25 | -48.45 | -16.20 |
| Fluorescein       | -18.69 | -17.48 | 32.39  | -3.22 | -36.17 | 29.17 | 13.70 | -20.70 | -7.00  |
| Valrubicin        | -18.57 | -43.99 | 68.42  | -5.61 | -62.56 | 62.81 | 49.85 | -49.60 | 0.25   |
| Ziprasidone       | -12.08 | -35.68 | 40.92  | -4.29 | -47.76 | 36.63 | 28.84 | -39.97 | -11.13 |
| Enasidenib        | -12.78 | -12.42 | 30.66  | -2.58 | -25.20 | 28.08 | 17.88 | -14.99 | 2.89   |
| Apixaban          | -13.63 | -33.47 | 43.96  | -4.29 | -47.10 | 39.67 | 30.33 | -37.76 | -7.43  |
| Dihydroergotamine | -17.40 | -37.71 | 41.51  | -4.26 | -55.12 | 37.26 | 24.11 | -41.97 | -17.86 |
| Trypan Blue       | -43.81 | -49.72 | 101.58 | -5.89 | -93.52 | 95.69 | 57.77 | -55.60 | 2.17   |
| Tadalafil         | -6.73  | -21.99 | 26.15  | -3.09 | -28.71 | 23.07 | 19.43 | -25.07 | -5.65  |
| Palbociclib       | -10.90 | -37.02 | 49.51  | -5.24 | -47.91 | 44.27 | 38.61 | -42.25 | -3.64  |
| Rolapitant        | -7.15  | -27.23 | 32.97  | -3.77 | -34.38 | 29.20 | 25.81 | -31.00 | -5.19  |
| Azilsartan        | -7.78  | -25.69 | 33.90  | -3.39 | -33.47 | 30.51 | 26.13 | -29.08 | -2.95  |
| Candesartan       | 1.44   | -29.19 | 24.63  | -4.22 | -27.74 | 20.41 | 26.07 | -33.41 | -7.33  |
| Ponatinib         | -4.03  | -18.95 | 20.49  | -2.99 | -22.98 | 17.50 | 16.46 | -21.94 | -5.48  |
| Venetoclax        | -1.24  | -13.50 | 16.37  | -2.73 | -14.73 | 13.64 | 15.13 | -16.23 | -1.10  |
| Mefloquine        | -4.92  | -16.84 | 18.71  | -2.78 | -21.75 | 15.93 | 13.80 | -19.62 | -5.82  |
| Eplerenone        | -8.20  | -18.03 | 22.96  | -3.21 | -26.23 | 19.75 | 14.76 | -21.23 | -6.48  |
| Azelastine        | -0.09  | -29.58 | 22.74  | -4.06 | -29.67 | 18.68 | 22.65 | -33.64 | -10.99 |
| Amphotericin B    | -24.32 | -34.90 | 62.63  | -5.03 | -59.22 | 57.60 | 38.31 | -39.93 | -1.62  |
| Idelalisib        | -4.37  | -13.19 | 17.68  | -2.58 | -17.56 | 15.10 | 13.31 | -15.77 | -2.46  |
| Maraviroc         | -17.96 | -38.74 | 45.35  | -4.98 | -56.69 | 40.37 | 27.39 | -43.72 | -16.32 |
| Telmisartan       | -7.36  | -28.50 | 36.99  | -4.53 | -35.86 | 32.46 | 29.63 | -33.03 | -3.40  |
| Natamycin I       | -23.45 | -51.59 | 72.39  | -5.88 | -75.04 | 66.50 | 48.93 | -57.47 | -8.54  |
| Itraconazole      | -8.34  | -30.30 | 34.56  | -4.11 | -38.64 | 30.45 | 26.22 | -34.41 | -8.19  |
| Natamycin II      | -10.95 | -22.77 | 31.92  | -3.58 | -33.71 | 28.33 | 20.97 | -26.35 | -5.38  |

<sup>a</sup>The MM/PBSA calculations were done on 500 snapshots sampled from 5 ns of ANI/MM simulations. The components are: Coul, Coulomb; LJ, Lennard-Jones; PB, Poisson-Boltzmann solvation; SA, surface area; gas = Coul + LJ, gas phase; sol = PB + SA, total solvation; pol = Coul + PB, polar component; npol = LJ + SA, nonpolar component; total = pol + npol, total binding energy.

**Table S4.** MD and ANI/MM based MM/PBSA binding free energies for the final selection of 9 drugs

| <b>Drug Name</b>  | <b>MD (kcal/mol)</b> | <b>ANI/MM (kcal/mol)</b> |
|-------------------|----------------------|--------------------------|
| Dihydroergotamine | -14.13               | -17.86                   |
| Midostaurin       | -9.41                | -16.20                   |
| Ziprasidone       | -9.42                | -11.13                   |
| Etoposide         | -4.93                | -9.96                    |
| Apixaban          | -4.84                | -7.43                    |
| Fluorescein       | -3.48                | -7.00                    |
| Tadalafil         | -4.97                | -5.65                    |
| Rolapitant        | -4.01                | -5.19                    |
| Palbociclib       | -1.56                | -3.64                    |

**Supporting Text: NAMD input script for ANI/MM:**

```

structure          ionized.psf
coordinates        ionized.pdb
set temp           303;
outputName         cov4;
set inputname      cov3;
binCoordinates     $inputname.coor;
binVelocities      $inputname.vel;
extendedSystem     $inputname.xsc;

```

```

proc get_first_ts { xscfile } {
  set fd [open $xscfile r]
  gets $fd
  gets $fd
  gets $fd line
  set ts [lindex $line 0]
  close $fd
  return $ts
}

```



```

}
set firsttime [get_first_ts $inputname.restart.xsc]
firsttimestep $firsttime

restartfreq      1000;
dcdfreq         1000;
xstFreq         1000;
outputEnergies  1000;
outputTiming    1000;

# Force-Field Parameters
paraTypeCharmm  on;
parameters      ../charmm/toppar/par_all36_carb.prm
parameters      ../charmm/toppar/par_all36_cgenff.prm
parameters      ../charmm/toppar/par_all36_lipid.prm
parameters      ../charmm/toppar/par_all36m_prot.prm
parameters      ../charmm/toppar/par_all36_na.prm
parameters      ../charmm/toppar/par_interface.prm
parameters      ../charmm/toppar/toppar_all36_prot_na_combined.str
parameters      ligand.par

exclude         scaled1-4
1-4scaling     1.0
Switching      on
vdwForceSwitching yes;
cutoff         12.0;
switchdist     10.0;
pairlistdist   14.0;
stepspercycle  20;
pairlistsPerCycle 2;

# Integrator Parameters
Timestep       2.0;
rigidBonds     all;
nonbondedFreq  1;
fullElectFrequency 1;

wrapWater      on;
wrapAll        on;
wrapNearest    off;

# PME (for full-system periodic electrostatics)
PME            yes;
PMEInterpOrder 6;
PMEGridSpacing 1.0;

```

# Constant Pressure Control (variable volume)

useGroupPressure yes;  
useFlexibleCell no;  
useConstantRatio no;

langevinPiston on;  
langevinPistonTarget 1.01325;  
langevinPistonPeriod 50.0;  
langevinPistonDecay 25.0;  
langevinPistonTemp \$temp;

# Constant Temperature Control

langevin on;  
langevinDamping 1.0;  
langevinTemp \$temp;  
langevinHydrogen off;

qmforces on  
qmParamPDB qmmm.pdb  
qmSoftware custom  
qmexecpath /home/agupt8/covid-dock/allfda/above8.5/36/client.py  
qmBaseDir /home/agupt8/covid-dock/allfda/above8.5/36/  
QMColumn occ  
qmChargeMode none  
qmElecEmbed off

# run

Run 2500000; # 5ns
